# Supplementary material
Source: Springer Nature journal article supplement (https://www.springermedizin.de/resource/supplementary/13229_2009_8_MOESM4_ESM.pdf/9675988)
Supplement: MOESM4 [file 9675988]

**Chromosome 7 SRS Linkage Results**

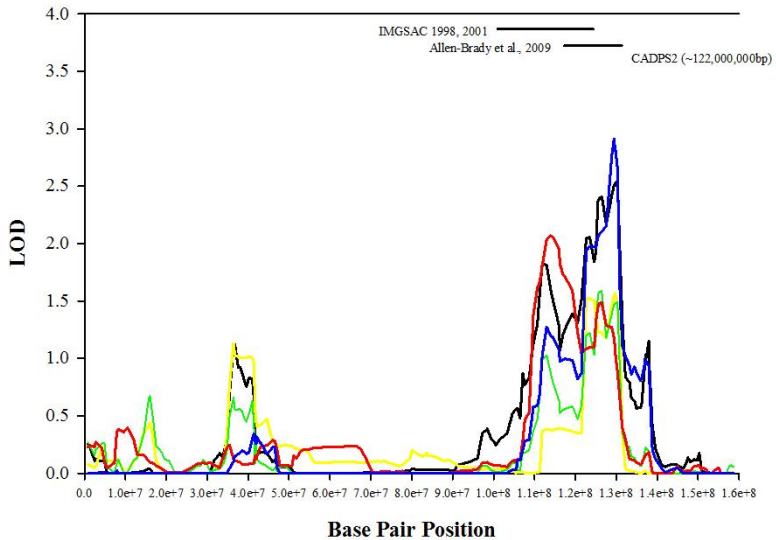

**Chromosome 11 SRS Linkage Results**

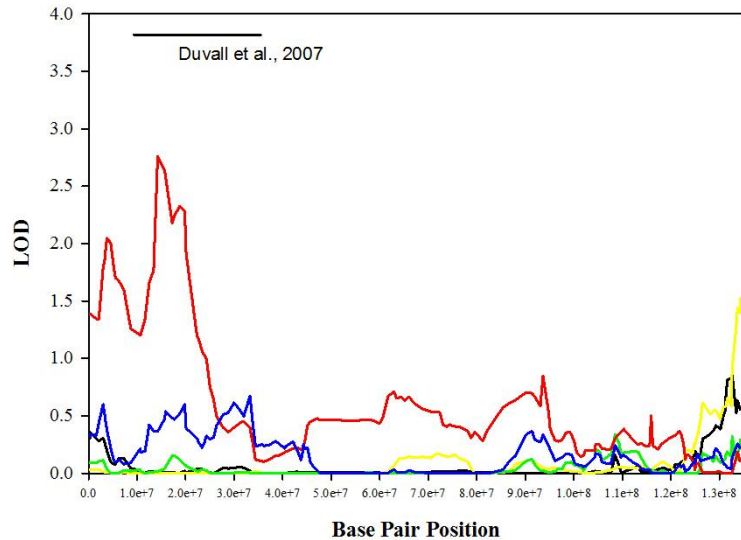

**Chromosome 13 SRS Linkage Results**

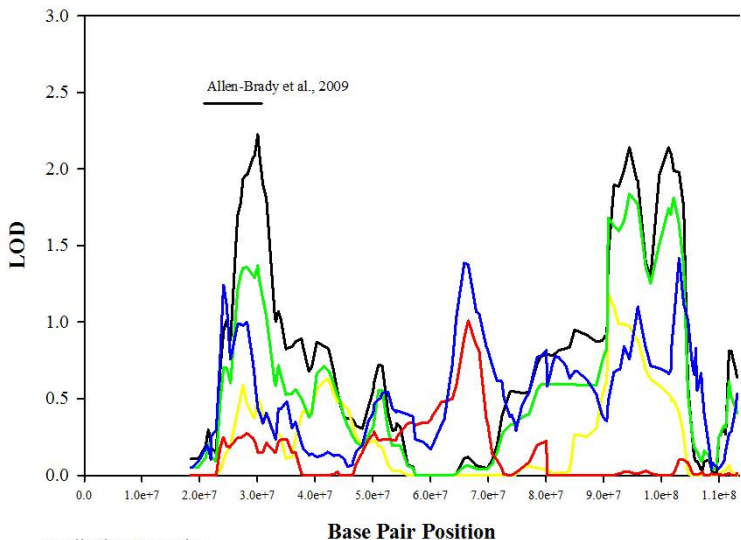

**Chromosome 15 SRS Linkage Results**

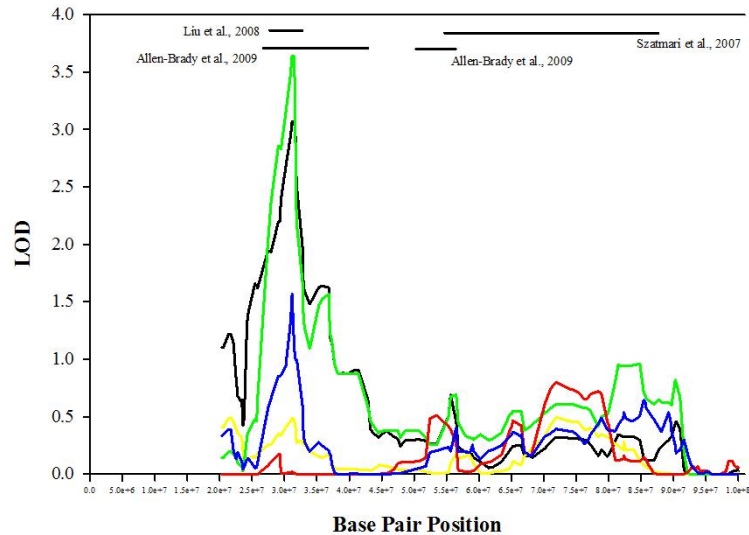

- Qualitative: Recessive
- Qualitative: Dominant
- Qualitative: NPL (LOD equivalent)
- Quantitative: Parametric
- Quantitative: NPL (LOD equivalent)
